# Supplementary material for: Ultrathin two-dimensional (2D) manganese-based metal–organic framework nanosheets for selective photocatalytic oxidation of thioether
Source: Royal Society of Chemistry journal article supplement (doi:10.1039/d4dt01251h), 2024-01-01
Supplement: d4dt01251h1.pdf [file d4dt01251h1.pdf]

## *Supporting Information*

### **Ultra-thin Two-dimensional (2D) Manganese-based Metal-Organic Framework Nanosheets for Photocatalytic Selective Oxidation Thioether**

Jing Zhu<sup>1</sup>, Cuimeng Huo<sup>2</sup>, Jin Chen<sup>2</sup>, Xiaoxing Ma<sup>1</sup>, Xiangjun Zhu<sup>2</sup>, Yan Li<sup>2</sup>, Guofang Li<sup>2</sup>, Haitao Chen<sup>2</sup>, Xianying Duan<sup>2</sup>, Fujiao Han<sup>2</sup>, Hongjun Kong<sup>2</sup>, Fuwei Zheng<sup>2\*</sup>, Aiyun Jiang<sup>1\*</sup>

<sup>1</sup> *Huanghe Science and Technology College, Zhengzhou, Henan 450063, China*

<sup>2</sup> *Institute of Chemistry Co. Ltd, Henan Academy of Sciences, Zhengzhou 450002, P. R. of China*

\*Correspondence Email: aiyunjiang@126.com; 15938783487@163.com

---

## Experimental Section

### Materials and Measurements.

All reagents and solvents are commercially available (Beijing innoChem Science & Technology Co. Ltd.), and they were further dried by the vacuum rotary evaporator to remove all traces of water and then stored in the N<sub>2</sub>-filled glovebox. The 15 mL Schlenk tube charged with a magnetic stirrer, which was used as the reactor in the trifluoromethylation reaction. The light was provided by a 30 W 425 nm LED light.

The chemical structures of the products were confirmed by comparison with standard chemicals and GC-MS (Agilent Technologies, GC 7890B, MS 5977A) data. GC equipped with a FID detector (Agilent Technologies, GC 7890 B) and a HP-5 5% phenyl methyl siloxane column (30m × 0.32mm × 0.5 μm), which was used for the quantifiable measure of trifluoromethoxybenzene. The size and morphology of catalysts were measured by a Hitachi New Generation SU8010 field emission scanning electron microscope (FE-SEM, JSM-670 F). The transmission electron microscopy (TEM) images, high-resolution transmission electron microscopy (HRTEM) images (with an acceleration voltage of 200 kV), and selected area fast Fourier transform (FFT) pattern were measured on a JEOL JEM-3000F microscope, which with a CCD camera as the detector. A Varian Cary 500 UV-Vis spectrophotometer was used to record the UV-Vis diffuse reflectance spectra (DRS) of various solid samples. The photoelectrochemical characterization was performed on a Metrohm-Autolab AUT302N Electrochemical workstation. Photocurrent measurements were carried out in a typical three-electrode configuration with an Ag/AgCl electrode, a coiled Pt wire as the reference and counter electrode, respectively. X-ray diffraction (XRD) studies of catalyst were carried out with a Bruker D8 Advance instrument. The electron paramagnetic resonance (EPR) experiments were carried out on Bruker A300 instrument operating in the X-band at room temperature. Diffuse Reflectance Infra-Red Fourier Transform (DRIFT)-pyridine measurements were performed by Vertex-70 from BRUKER.

### Single-crystal X-ray crystallography.

Diffraction data for all complexes were measured on a Bruker SMART CCD diffractometer (Mo K $\alpha$  radiation and  $\lambda = 0.71073 \text{ \AA}$ ) in  $\Phi$  and  $\omega$  scan modes. All structures were solved by direct methods, followed by difference Fourier syntheses, and then refined by full-matrix least-squares techniques on  $F^2$  using SHELXL.<sup>[1]</sup> All other non-hydrogen atoms were refined with anisotropic thermal parameters. Hydrogen atoms were placed in the calculated position and refined in the isotropic direction using a riding model. Table S1 summarizes X-ray crystallographic data and refinement details for the complexes. The CCDC reference numbers are 2370446 for **HSTC 3**.

[1] Sheldrick, G. M. *Acta Crystallogr., Sect. C: Struct. Chem.* **2015**, *71*, 3-8.

### Synthesis of complexes HSTC 3 and HSTC 3-NS.

**HSTC 3:** Adding 30 mg H<sub>4</sub>L1 ligand (0.05 mmol), and 99 mg MnCl<sub>2</sub>·4H<sub>2</sub>O (0.5 mmol) in 9 mL DMF and 1 mL H<sub>2</sub>O, then stirred 30 minutes in 20 mL ampulla. Then, the ampulla was heated at 80 °C for 48 h, and the reaction was terminated, colorless strip crystals were obtained. **HSTC 3:** yield: 80% (based on H<sub>4</sub>L1). Elemental analyses *calc.* (%) for [Mn<sub>2</sub>(C<sub>30</sub>H<sub>16</sub>O<sub>8</sub>)(H<sub>2</sub>O)<sub>2</sub>(DMF)<sub>2</sub>]<sub>n</sub>·(CH<sub>3</sub>CH<sub>2</sub>OH)<sub>n</sub> (**HSTC 3**): C 51.69, H 5.85, N 5.24. Found: C 51.45, H 5.76, N 5.36.

**HSTC 3-NS:** The sample of **HSTC 3-NS** (100 mg) was ultrasonically treated in 50 mL EtOH for 30 minutes at room temperature. Afterwards, the sample was ultrasonically treated for 10 hours. Then, the powder of **HSTC 3-NS** was separated by centrifugation and washed by 10 mL acetone thrice, and dried in air at room temperature (yield: 92%). Ultrasonic stripping of **HSTC 3** was peeled out Granbo Ultrasonic Cleaner (GX0410) under room temperature. The ultrasonic frequency is 40 KHz, the ultrasonic power is 240 W.

**Table S1.** Crystallographic data of the complex **HSTC 3**.

| Complex                                                         | HSTC 3                                                                    |
|-----------------------------------------------------------------|---------------------------------------------------------------------------|
| Formula                                                         | C <sub>65.84</sub> H <sub>48.02</sub> Mn <sub>2</sub> NO <sub>20.57</sub> |
| Formula weight                                                  | 1292.15                                                                   |
| <i>T</i> (K)                                                    | 150.15                                                                    |
| Crystal system                                                  | Triclinic                                                                 |
| Space group                                                     | <i>P</i> -1                                                               |
| <i>a</i> (Å)                                                    | 12.3933 (4)                                                               |
| <i>b</i> (Å)                                                    | 13.4724 (4)                                                               |
| <i>c</i> (Å)                                                    | 14.8545 (5)                                                               |
| <i>α</i> (°)                                                    | 71.856 (3)                                                                |
| <i>β</i> (°)                                                    | 69.878 (3)                                                                |
| <i>γ</i> (°)                                                    | 75.205 (2)                                                                |
| <i>V</i> (Å <sup>3</sup> )                                      | 2182.28 (13)                                                              |
| <i>Z</i>                                                        | 1                                                                         |
| <i>D<sub>c</sub></i> (g cm <sup>-3</sup> )                      | 0.980                                                                     |
| <i>μ</i> (mm <sup>-1</sup> )                                    | 2.821                                                                     |
| Reflns coll.                                                    | 25387                                                                     |
| Unique reflns                                                   | 8564                                                                      |
| <i>R</i> <sub>int</sub>                                         | 0.0837                                                                    |
| <sup>a</sup> <i>R</i> <sub>1</sub> [ <i>I</i> ≥ 2σ( <i>I</i> )] | 0.0625                                                                    |
| <sup>b</sup> <i>wR</i> <sub>2</sub> (all data)                  | 0.1787                                                                    |
| GOF                                                             | 1.026                                                                     |

$${}^aR_1 = \frac{\sum ||F_o| - |F_c||}{\sum |F_o|}, {}^b wR_2 = \left[ \frac{\sum w(F_o^2 - F_c^2)^2}{\sum w(F_o^2)^2} \right]^{1/2}$$

**Table S2.** Selected bond lengths (Å) and angles (°) of complex **HSTC 3**.

| Bond lengths (Å)                                                                                |             |                                         |             |                           |             |
|-------------------------------------------------------------------------------------------------|-------------|-----------------------------------------|-------------|---------------------------|-------------|
| Mn1—O1                                                                                          | 2.147 (2)   | Mn1—O8 <sup>iii</sup>                   | 2.143 (2)   | Mn1—O9A                   | 2.127 (5)   |
| Mn1—O3 <sup>i</sup>                                                                             | 2.165 (2)   | Mn1—O10                                 | 2.296 (5)   | Mn1—O9                    | 2.277 (5)   |
| Mn1—O6 <sup>ii</sup>                                                                            | 2.173 (2)   | Mn1—O11                                 | 2.093 (5)   |                           |             |
| Bond angles (°)                                                                                 |             |                                         |             |                           |             |
| O1—Mn1—O3 <sup>i</sup>                                                                          | 87.11 (8)   | O6 <sup>ii</sup> —Mn1—O9                | 171.32 (16) | O11—Mn1—O6 <sup>ii</sup>  | 97.39 (16)  |
| O1—Mn1—O6 <sup>ii</sup>                                                                         | 94.04 (9)   | O8 <sup>iii</sup> —Mn1—O1               | 177.32 (8)  | O11—Mn1—O8 <sup>iii</sup> | 84.04 (16)  |
| O1—Mn1—O10                                                                                      | 85.63 (13)  | O8 <sup>iii</sup> —Mn1—O3 <sup>i</sup>  | 94.40 (10)  | O11—Mn1—O9A               | 70.5 (2)    |
| O1—Mn1—O9                                                                                       | 92.25 (14)  | O8 <sup>iii</sup> —Mn1—O6 <sup>ii</sup> | 88.18 (9)   | O9A—Mn1—O1                | 85.01 (15)  |
| O3 <sup>i</sup> —Mn1—O6 <sup>ii</sup>                                                           | 90.16 (9)   | O8 <sup>iii</sup> —Mn1—O10              | 93.21 (14)  | O9A—Mn1—O3 <sup>i</sup>   | 101.99 (16) |
| O3 <sup>i</sup> —Mn1—O10                                                                        | 168.61 (15) | O8 <sup>iii</sup> —Mn1—O9               | 85.71 (14)  | O9A—Mn1—O6 <sup>ii</sup>  | 167.74 (16) |
| O3 <sup>i</sup> —Mn1—O9                                                                         | 84.18 (16)  | O11—Mn1—O1                              | 94.17 (15)  | O9A—Mn1—O8 <sup>iii</sup> | 92.51 (15)  |
| O6 <sup>ii</sup> —Mn1—O10                                                                       | 81.62 (14)  | O11—Mn1—O3 <sup>i</sup>                 | 172.23 (17) | O9—Mn1—O10                | 104.9 (2)   |
| Symmetry codes: (i) -x, -y+1, -z+2; (ii) x-1, y+1, z; (iii) -x+1, -y+1, -z+1; (iv) x+1, y-1, z. |             |                                         |             |                           |             |

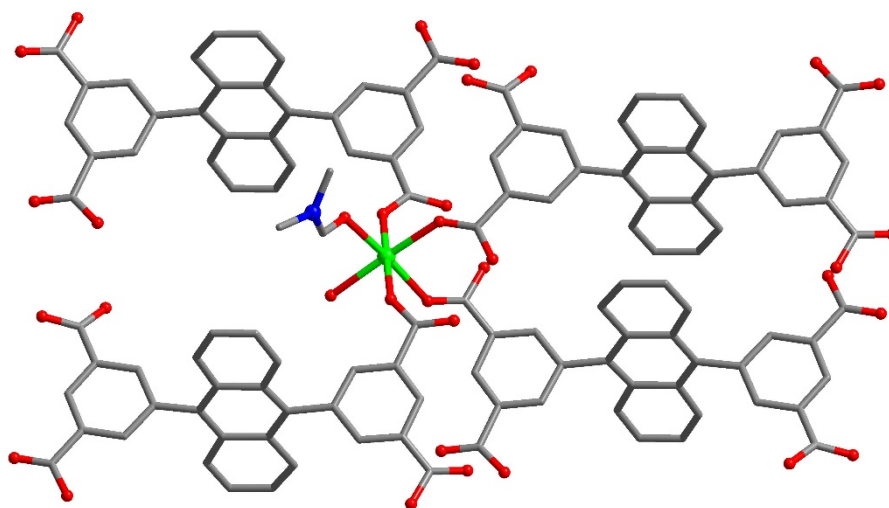**Figure S1.** The coordinated environment of Mn1 ion of **HSTC 3**.

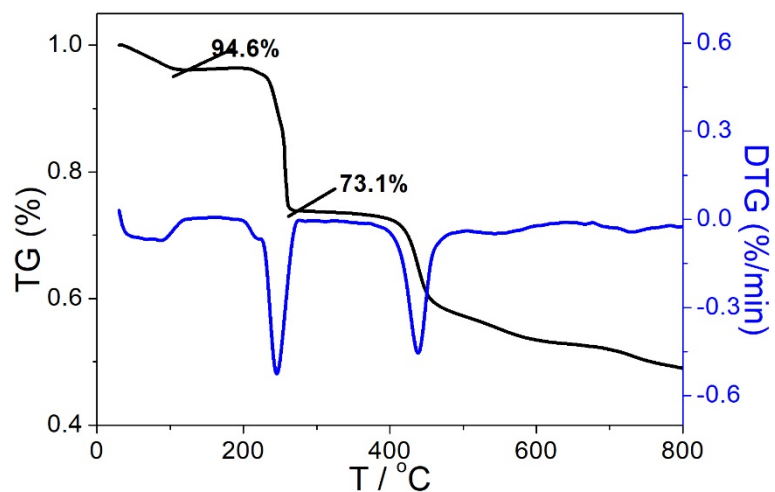

**Figure S2.** The TG curve of **HSTC 3** under heating in flowing  $N_2$  at  $5\text{ }^\circ\text{C}\cdot\text{min}^{-1}$  over the temperature range of 35-800  $^\circ\text{C}$ .

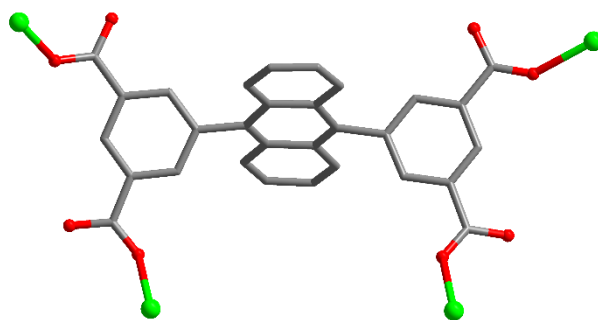

**Figure S3.** The coordinated mode for  $L1^{4-}$  ligand for **HSTC 3**.

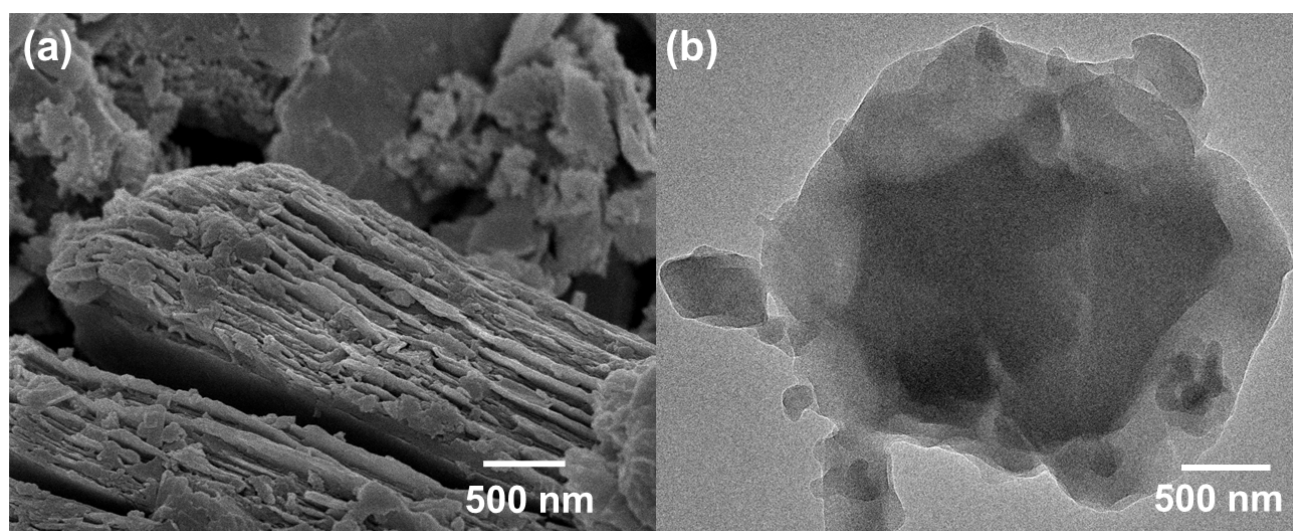

**Figure S4.** The FE-SEM (a) and HRTEM (b) for **HSTC 3**.



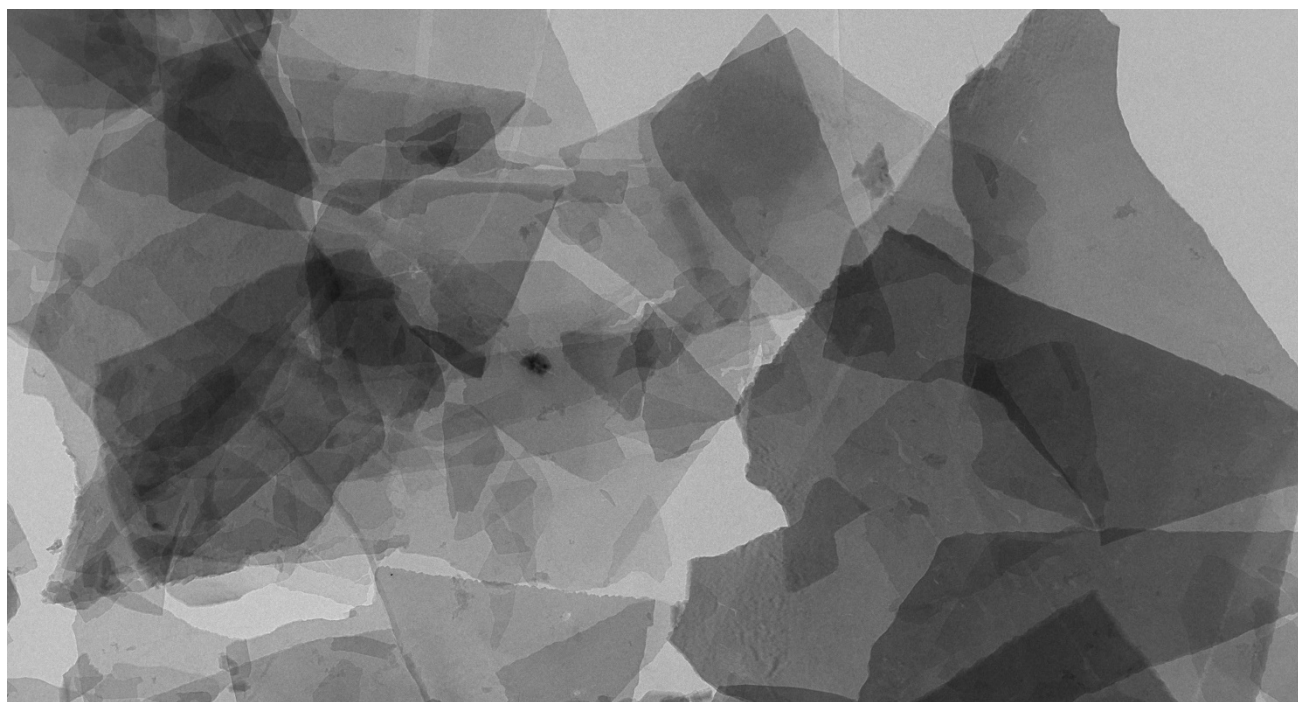

**Figure S5.** The HRTEM of the nanosheet distribution for HSTC 3-NS.

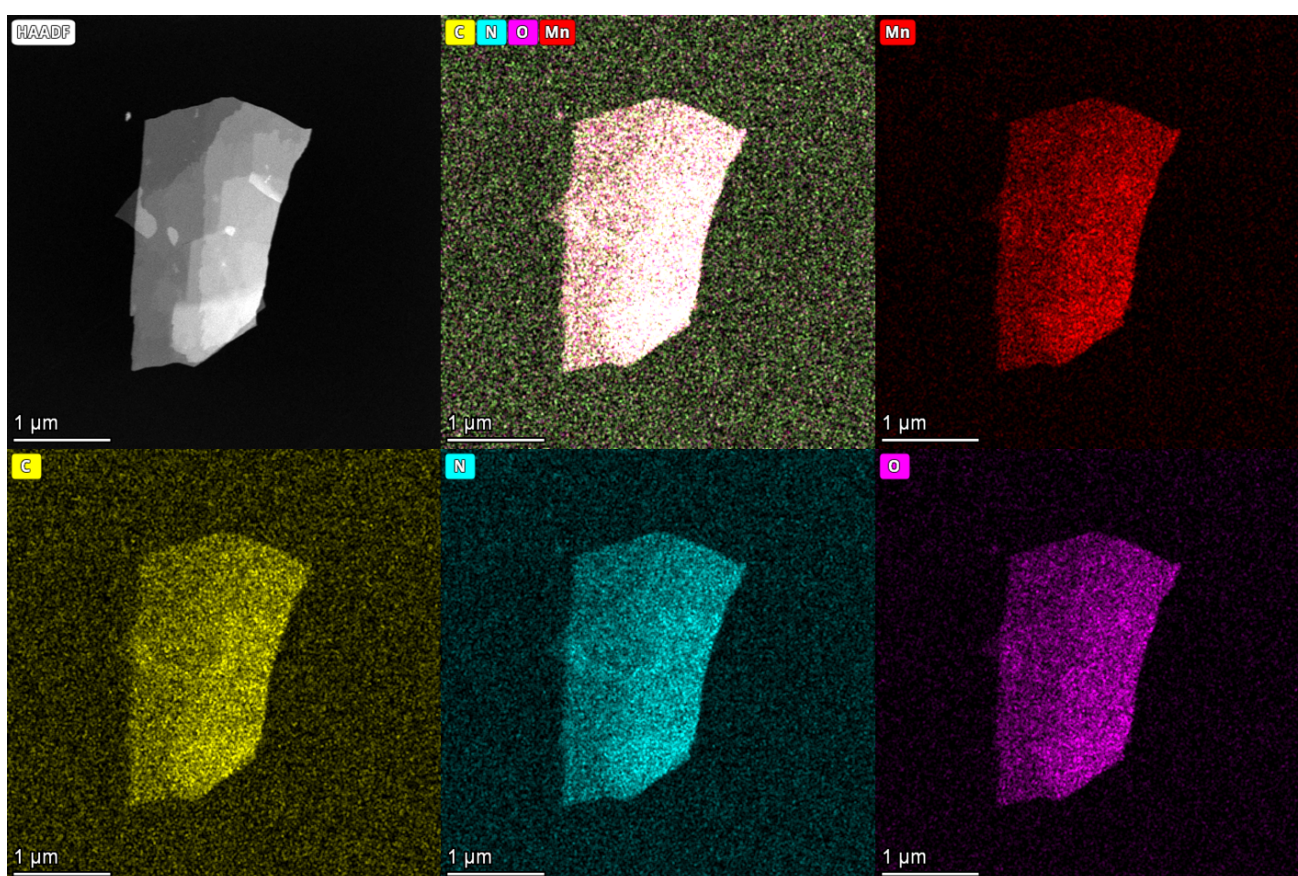

**Figure S6.** The mapping of high-resolution TEM images for HSTC 3-NS.

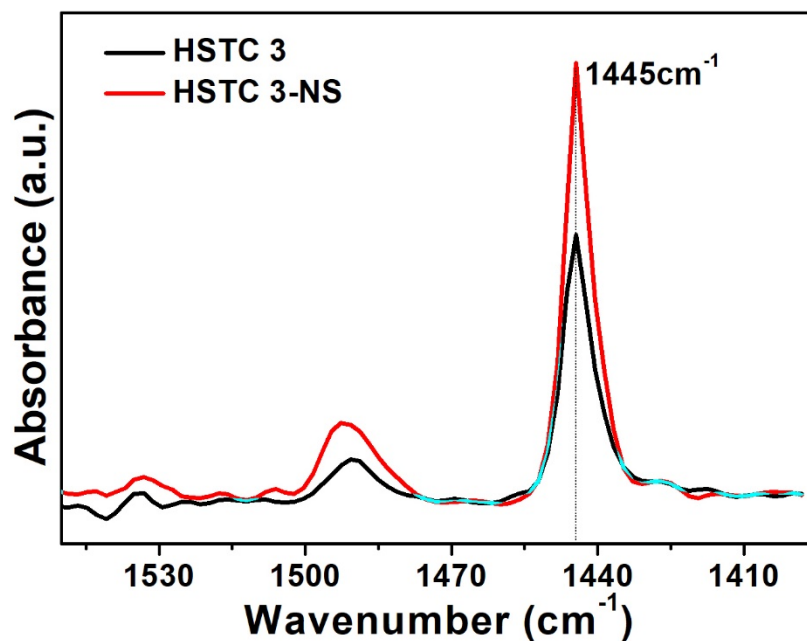

**Figure S7.** DRIFT spectroscopy with pyridine adsorption of **HSTC 3** and **HSTC 3-NS**.

**Table S3.** Photocatalytic Results of MOF in the Trifluoromethylation of Benzene.

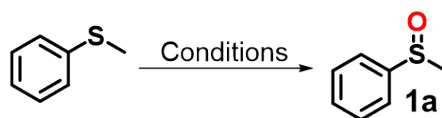

| Entry | Additive          | Yield of <b>3a</b> (%) |
|-------|-------------------|------------------------|
| 1     | None              | 100                    |
| 2     | AgNO <sub>3</sub> | 11                     |
| 3     | Ammonium oxalate  | 29                     |

Reaction conditions: 0.2 mmol thioanisole, 2 mL CH<sub>3</sub>OH, 10 mg **HSTC 3-NS**, 120 min reaction time, air atmosphere. All yield of **1a** determined by GC-MS.
